# Supplementary material for: Molecular cloning and characterization of farnesyl diphosphate synthase from Rosa rugosa Thunb associated with salinity stress
Source: PeerJ. 2024 Feb 29;12:e16929. doi: 10.7717/peerj.16929 (PMC10909355; doi:10.7717/peerj.16929)
Supplement: Supplemental Information 1 [file peerj-12-16929-s001.xlsx]

## Sheet: Sheet1
	The raw data of qPCR for RrFPPSs gene in flower and leaf of R. rugosa ‘Zi Zhi’
Individual	biological replications	Cq value of internal reference gene	Cq value of RrFPPS1 gene	Cq value of RrFPPS2 gene
Flower of R. rugosa ‘Zi Zhi’	1	13.6967	24.97	23.95
	2	13.58	25.4267	24.4833
	3	13.9867	26.0467	24.7533
Leaf of R. rugosa ‘Zi Zhi’	1	12.41	25.4933	24.1467
	2	13.43	26.9967	24.12
	3	12.9633	26.9867	24.66

## Sheet: Sheet2
The raw data of qPCR for RrFPPSs gene in salt treatment of R. rugosa ‘Zi Zhi’
Individual	biological replications	Cq value of internal reference gene	Cq value of RrFPPS1 gene	Cq value of RrFPPS2 gene
Control	1	14.2833	27.9467	25.0133
	2	13.9567	27.5033	25.2467
	3	14.9667	27.81	24.7867
Salt treatment	1	14.2133	24.7667	23.35
	2	13.97	25.9233	22.74
	3	15.01	26.0567	23.8
