# Supplementary material for: Molecular cloning and characterization of farnesyl diphosphate synthase from Rosa rugosa Thunb associated with salinity stress
Source: PeerJ. 2024 Feb 29;12:e16929. doi: 10.7717/peerj.16929 (PMC10909355; doi:10.7717/peerj.16929)
Supplement: Supplemental Information 2 [file peerj-12-16929-s002.xlsx]

## Sheet: Sheet1
MIQE checklist
Item to check			Location
Experimental design	Definition of experimental and control groups	Experimental group： Roots of R. rugosa were treated with 0.1 M NaCl solution immediately for 1 h. ; Control group: Another three plants that were soaked in deionized water for 1 h.	Line 87-90；179-183.
	Number within each group	3 biological replicates.	Line 87-90；179-184.
	Assay carried out by the core or investigator’s laboratory?	Investigator’s laboratory.	Line 87-90；179-185.
	Acknowledgment of authors’ contributions	Yudie Chen performed the experiments; Guo Wei and Yudie Chen analyzed the data, prepared figures and/or tables.	Line 87-90；179-186.
Sample	Description	Samples were collected from leaves and flowers of R. rugosa.	Line 87-90；179-187.
	Volume/mass of sample processed	0.1 g sample.	Line 87-90；179-188.
	Microdissection or macrodissection	Macrodissection.	Line 87-90；179-189.
	Processing procedure	The leaves of Experimental group and control group plants were picked.	Line 87-90；179-190.
	If frozen, how and how quickly?	The samples were immediately frozen in the liquid nitrogen and then stored at -80°C.	Line 87-90；179-191.
	If fixed, with what and how quickly?	None.	Line 87-90；179-192.
	Sample storage conditions and duration (especially for FFPEb samples)	The samples were stored at -80°C for 2 weeks.	Line 87-90；179-193.
Nucleic acid extraction	Procedure and/or instrumentation	TaKaRa MiniBEST Plant RNA Extraction Kit (9769)；centrifuge(Eppendorf).	Line 93-96.
	Name of kit and details of any modifications	TaKaRa MiniBEST Plant RNA Extraction Kit (9769).	Line 93-96.
	Source of additional reagents used	Ethanol absolute.	Line 93-96.
	Details of DNase or RNase treatment	DNase I (Takara:9769).	Line 93-96.
	Contamination assessment (DNA or RNA)	Gel electrophoresis.	Line 93-96.
	Nucleic acid quantification	Nucleic acid quantification was calculated by NanoDrop Spectrophotometer .	Line 93-96.
	Instrument and method	NanoDrop Spectrophotometer .	Line 93-96.
	RNA integrity: method/instrument	Gel electrophoresis；Compare the brightness of 28S and 18S.	Line 93-96.
	RIN/RQI or Cq of 3_x0002_ and 5_x0002_ transcripts	None.	None.
	Inhibition testing (Cq dilutions, spike, or other)	None.	None.
Reverse transcription	Complete reaction conditions	The HiScript III RT SuperMix for qPCR (Vazyme) was used for RT-qPCR analysis as per the manufacturer's instructions.	Line 98-99.
	Amount of RNA and reaction volume	1 µg RNA.	Line 98-99.
	Priming oligonucleotide (if using GSP) and concentration	None.	None.
	Reverse transcriptase and concentration	HiScript III Reverse Transcriptase.	Line 98-99.
	Temperature and time	37°C 15 min；85°C 5sec.	Line 98-99.
	Storage conditions of cDNA	cDNA was stored at −20°C refrigerator.	Line 98-99.
qPCR target information	Gene symbol	RrFPPS1(Rru05G067530); RrFPPS2(Rru05G000330)	Line 192-201.
	Sequence accession number	None.	Line 192-201.
	Amplicon length	RrFPPS1:109 bp; RrFPPS2:93 bp	Line 192-201.
	In silico specificity screen (BLAST, and so on)	BLAST.	Line 192-201.
	Location of each primer by exon or intron (if applicable)	Each primer was located in exon.	Line 192-201.
	What splice variants are targeted?	None.	None.
qPCR oligonucleotides	Primer sequences	In Supplementary Table 1.	In Supplementary Table 1.
	Location and identity of any modifications	None.	None.
qPCR protocol	Complete reaction conditions	95 °C for 30 s; (95 °C for 10 s; 60 °C for 30 s + Plate Read；Goto 2 repeat 39；) Melt Curve 65 to 95 °C, increment 0.5 °C for 5s +Plate Read；END	Line 110-111.
	Reaction volume and amount of cDNA/DNA	1 µg cDNA.	Line 103-108.
	Primer, (probe), Mg2+, and dNTP concentrations	None (Mix reaction volume of ChamQ SYBR qPCR Master Mix，vazyme).	Line 103-108.
	Polymerase identity and concentration	None (Mix reaction volume of ChamQ SYBR qPCR Master Mix，vazyme).	Line 103-108.
	Buffer/kit identity and manufacturer	None (Mix reaction volume of ChamQ SYBR qPCR Master Mix，vazyme).	Line 103-108.
	Additives (SYBR Green I, DMSO, and so forth)	SYBR Green.	Line 103-108.
	Complete thermocycling parameters	95 °C for 30 s; (95 °C for 10 s; 60 °C for 30 s + Plate Read；Goto 2 repeat 39；) Melt Curve 65 to 95 °C, increment 0.5 °C for 5s +Plate Read；END	Line 110-111.
	Manufacturer of qPCR instrument	BioRad.	Line 104.
qPCR validation	Specificity (gel, sequence, melt, or digest)	Melt.	Line 103-108.
	For SYBR Green I, Cq of the NTC	None.	None.
	Calibration curves with slope and y intercept	None.	None.
	PCR efficiency calculated from slope	None.	None.
	r 2 of calibration curve	None.	None.
	Linear dynamic range	None.	None.
	Cq variation at LOD	None.	None.
	Evidence for LOD	None.	None.
	If multiplex, efficiency and LOD of each assay	None.	None.
Data analysis	qPCR analysis program (source, version)	BioRadCFX Manager.	Line 103-104.
	Method of Cq determination	2-△△ct.	Line 111-113.
	Outlier identification and disposition	None.	None.
	Results for NTCs	No amplification SYBR signal.	Line 108-110.
	Justification of number and choice of reference genes	5.8S(F:CGGCAACGGATATCTCGG;R:TGTGACGCCCAGGCAGACG)	Line 104-105.
	Description of normalization method	Normalization method：Normalization of reference gene.	Line 104-105.
	Number and stage (reverse transcription or qPCR) of technical replicates	3 technical replicates.	Line 111-112.
	Repeatability (intraassay variation)	3 biological replicates.	Line 111-112.
	Statistical methods for results significance	One-way Anova.	Line 115-116.
	Software (source, version)	Graphpad Prism.	Line 115-116.
